# Supplementary material
Source: publisher site journal article supplement (https://www.dovepress.com/article/368890)
Supplement: Supplementary file 1 [file get_supplementary_file.php]

**Supplementary material**

**Table S1. Primers used for real-time PCR**

| Gene | Sequence | Reference |
| --- | --- | --- |
| *rpoB* | F: ATGCCGCCTGAAAAAGTAAC  R: CGAGCGCCTACTGGAATTA | 10 |
| *wzc* | F: CTCCACCAGTGCTTGCAGTA  R: CAGCGCTAGCACGTTGAATA | 37, 38, 39 |
| *gnaA* | F: TCTTCTGCATCAGCCCAAGG  R: CGCGCTCAAAAGTAGGGGTA | 37, 38, 39, and this study |
| *galU* | F: CGGCCAACCACAGATAAGTT  R: AGCCAAGCTGCTCAAATCAT | 37, 38, 39 |
